# Supplementary material
Source: publisher site journal article supplement (https://www.spandidos-publications.com/7506/downloadSupplementary)
Supplement: Supplementary file 1 [file downloadSupplementary]

Table SI. GC-MS analysis of PNEO extracted by MAE.

| No.                   | CAS         | Compound                                                                                                                         | Molecular formula                            | Rt/min | Similarity | Relative peak area (%) |
|-----------------------|-------------|----------------------------------------------------------------------------------------------------------------------------------|----------------------------------------------|--------|------------|------------------------|
| Aldehydes (2.488%)    |             |                                                                                                                                  |                                              |        |            |                        |
| 1                     | 100-52-7    | Benzaldehyde                                                                                                                     | C <sub>7</sub> H <sub>6</sub> O              | 5.31   | 94.12      | 0.152                  |
| 2                     | -           | (1R,4aR,4bS,7S,10aR)-1,4a,7-Trimethyl-7-vinyl-1,2,3,4,4a,4b,5,6,7,8,10,10a-dodecahydrophenanthrene-1-carbaldehyde                | C <sub>20</sub> H <sub>30</sub> O            | 44.87  | 88.92      | 0.945                  |
| 3                     | 19898-57-8  | (1R,4aR,4bS,10aR)-1,4a-dimethyl-7-propan-2-ylidene-3,4,4b,5,6,9,10,10a-octahydro-2H-phenanthrene-1-carbaldehyde                  | C <sub>20</sub> H <sub>30</sub> O            | 50.96  | 88.47      | 0.157                  |
| 4                     | 13601-88-2  | 1-Phenanthrenecarboxaldehyd                                                                                                      | C <sub>20</sub> H <sub>28</sub> O            | 46.98  | 82.52      | 1.054                  |
| 5                     | 25152-83-4  | (E,Z)-2,4-Decadienal                                                                                                             | C <sub>10</sub> H <sub>16</sub> O            | 11.58  | 81.50      | 0.180                  |
| Hydrocarbons (9.175%) |             |                                                                                                                                  |                                              |        |            |                        |
| 1                     | 500-00-5    | Cyclohexene, 4-methyl-1-(1-methylethyl)-                                                                                         | C <sub>10</sub> H <sub>18</sub>              | 5.71   | 85.62      | 0.104                  |
| 2                     | 1124-20-5   | Benzene, 1-methyl-3-(1-methylethenyl)-                                                                                           | C <sub>10</sub> H <sub>12</sub>              | 7.57   | 93.18      | 0.284                  |
| 3                     | 765-46-8    | <u>Spiro[2.4]hepta-4,6-diene</u>                                                                                                 | C <sub>7</sub> H <sub>8</sub>                | 7.99   | 87.19      | 0.044                  |
| 4                     | 3479-89-8   | 1,3,5-Cycloheptatriene, 3,7,7-trimethyl-                                                                                         | C <sub>10</sub> H <sub>14</sub>              | 8.76   | 86.84      | 0.027                  |
| 5                     | 24703-35-3  | (1S,2E,6E,10R)-3,7,11,11-Tetramethyl-bicyclo[8.1.0]undeca-2,6-diene                                                              | C <sub>15</sub> H <sub>24</sub>              | 11.89  | 89.99      | 0.902                  |
| 6                     | 267665-20-3 | (1S,4S,4aS)-1-Isopropyl-4,7-dimethyl-1,2,3,4,4a,5-hexahydronaphthalene                                                           | C <sub>15</sub> H <sub>24</sub>              | 12.33  | 89.12      | 0.732                  |
| 7                     | 39029-41-9  | (R)- $\gamma$ -cadinene                                                                                                          | C <sub>15</sub> H <sub>24</sub>              | 14.48  | 89.02      | 0.131                  |
| 8                     | 489-28-1    | $\alpha$ -maalinene                                                                                                              | C <sub>15</sub> H <sub>24</sub>              | 14.54  | 87.81      | 0.150                  |
| 9                     | 1898-13-1   | Cembrene                                                                                                                         | C <sub>20</sub> H <sub>32</sub>              | 39.17  | 87.02      | 1.139                  |
| 10                    | -           | Naphthalene, 1,2,3,5,6,7,8,8a- octahydro-1,8a-dimethyl-7-(1-methylethenyl)-, [1R-(1. $\alpha$ ., 7. $\beta$ ., 8a. $\alpha$ .)]- | C <sub>15</sub> H <sub>24</sub>              | 14.73  | 89.66      | 0.498                  |
| 11                    | 64363-64-0  | (1E,3E,7E,11E)-4-Isopropyl-1,7,11-trimethylcyclotetradeca-1,3,7,11-tetraene                                                      | C <sub>20</sub> H <sub>32</sub>              | 36.22  | 90.93      | 1.048                  |
| 12                    | 630-04-6    | <u>Hentriacontane</u>                                                                                                            | C <sub>31</sub> H <sub>64</sub>              | 72.88  | 88.48      | 2.189                  |
| 13                    | 108-88-3    | Toluene                                                                                                                          | C <sub>7</sub> H <sub>8</sub>                | 6.74   | 83.76      | 0.018                  |
| 14                    | -           | 4b,8-Dimethyl-2-isopropylphenanthrene, 4b,5,6,7,8,8a,9,10-octahydro-                                                             | C <sub>19</sub> H <sub>28</sub>              | 36.49  | 81.96      | 0.104                  |
| 15                    | 629-94-7    | Heneicosane                                                                                                                      | C <sub>21</sub> H <sub>44</sub>              | 44.68  | 81.69      | 0.082                  |
| 16                    | 274-09-9    | 1,3-Benzodioxole                                                                                                                 | C <sub>7</sub> H <sub>6</sub> O <sub>2</sub> | 6.75   | 81.61      | 0.017                  |
| 17                    | 1758-88-9   | Benzene, 2-ethyl-1,4-dimethyl-                                                                                                   | C <sub>10</sub> H <sub>14</sub>              | 7.98   | 81.13      | 0.022                  |
| 18                    | 13943-77-6  | Naphthalene,1,2,3,4,4a,5,6,7-octahydro-4a-methyl-                                                                                | C <sub>11</sub> H <sub>18</sub>              | 11.29  | 81.04      | 0.328                  |

|                    |            |                                                                               |                                                |       |       |       |
|--------------------|------------|-------------------------------------------------------------------------------|------------------------------------------------|-------|-------|-------|
| 19                 | -          | 3,4-dimethylfuran                                                             | C <sub>6</sub> H <sub>8</sub> O                | 5.38  | 80.92 | 0.009 |
| 20                 | 515-17-3   | γ-selinene                                                                    | C <sub>15</sub> H <sub>24</sub>                | 18.51 | 80.84 | 1.196 |
| 21                 | 547-60-4   | Bicyclo[3.1.1]heptan-3-one,2,6,6-trimethyl-, (1.α.,2.α.,5.α.)-                | C <sub>10</sub> H <sub>16</sub> O              | 8.90  | 80.72 | 0.151 |
| 22                 | 18127-14-5 | Bicyclo[2.2.1]heptane,2-(2-methylpropyl)-                                     | C <sub>11</sub> H <sub>20</sub>                | 29.85 | 80.05 | 0.154 |
| Terpenes (8.886%)  |            |                                                                               |                                                |       |       |       |
| 1                  | 99-83-2    | α-Phellandrene                                                                | C <sub>10</sub> H <sub>16</sub>                | 6.06  | 89.46 | 0.045 |
| 2                  | 99-86-5    | α-Terpinene                                                                   | C <sub>10</sub> H <sub>16</sub>                | 6.27  | 92.71 | 0.825 |
| 3                  | 4889-83-2  | 3,6,6-Trimethyl-bicyclo(3.1.1)hept-2-ene                                      | C <sub>10</sub> H <sub>16</sub>                | 6.59  | 86.80 | 0.020 |
| 4                  | 13466-78-9 | carene                                                                        | C <sub>10</sub> H <sub>16</sub>                | 6.78  | 85.81 | 0.465 |
| 5                  | 99-85-4    | γ-terpinene                                                                   | C <sub>10</sub> H <sub>16</sub>                | 7.01  | 93.59 | 0.077 |
| 6                  | 1879-07-8  | cis-1-methyl-4-(1-methylethenyl)-Cyclohexane                                  | C <sub>10</sub> H <sub>18</sub>                | 6.08  | 84.90 | 0.029 |
| 7                  | 3387-41-5  | 4-methylene-1-(1-methylethyl)-Bicyclo[3.1.0]hexane                            | C <sub>10</sub> H <sub>16</sub>                | 11.49 | 84.69 | 0.163 |
| 8                  | -          | 1-ethenyl-1-methyl-2-(1-methylethenyl)-4-(1-methylethylidene)-Cyclohexane     | C <sub>15</sub> H <sub>24</sub>                | 29.26 | 84.32 | 0.940 |
| 9                  | 20230-48-2 | (5β,8α,9β,10α,12α)-Atis-16-ene                                                | C <sub>20</sub> H <sub>32</sub>                | 37.22 | 83.68 | 0.046 |
| 10                 | 73209-42-4 | trans-Calamenene                                                              | C <sub>15</sub> H <sub>22</sub>                | 17.20 | 83.28 | 0.159 |
| 11                 | 5256-65-5  | Cyclohexene,3-methyl-6-(1-methylethyl)-                                       | C <sub>10</sub> H <sub>18</sub>                | 6.37  | 83.23 | 0.003 |
| 12                 | 5989-27-5  | D-Limonene                                                                    | C <sub>10</sub> H <sub>16</sub>                | 5.27  | 83.06 | 0.020 |
| 13                 | 471-84-1   | α-fenchene                                                                    | C <sub>10</sub> H <sub>16</sub>                | 5.78  | 82.84 | 0.488 |
| 14                 | 24406-05-1 | α-cadinene                                                                    | C <sub>15</sub> H <sub>24</sub>                | 17.52 | 82.51 | 1.534 |
| 15                 | 504-96-1   | Neophytadiene                                                                 | C <sub>20</sub> H <sub>38</sub>                | 45.55 | 82.51 | 1.306 |
| 16                 | 29837-12-5 | Cubenene                                                                      | C <sub>15</sub> H <sub>24</sub>                | 17.36 | 82.24 | 0.567 |
| 17                 | -          | Cadala-1(10),3,8-triene                                                       | C <sub>15</sub> H <sub>22</sub>                | 28.17 | 82.27 | 0.297 |
| 18                 | 3310-2-9   | Bicyclo[3.1.0]hexan-3-ol, 4-methylene-1-(1-methylethyl)-, (1.α.,3.α.,5.α.)-   | C <sub>10</sub> H <sub>16</sub> O              | 8.51  | 82.16 | 0.279 |
| 19                 | 18479-64-6 | Shisool                                                                       | C <sub>10</sub> H <sub>18</sub> O              | 10.36 | 82.10 | 0.170 |
| 20                 | 81968-62-9 | 4(15),5,10(14)-Germacatrien-1-ol                                              | C <sub>15</sub> H <sub>24</sub> O              | 26.15 | 81.22 | 0.473 |
| 21                 | -          | ((8R,8aS)-8-Isopropyl-5-methyl-3,4,6,7,8,8a-hexahydronaphthalen-2-yl)methanol | C <sub>15</sub> H <sub>24</sub> O              | 27.50 | 81.20 | 0.509 |
| 22                 | 73809-82-2 | Salvial-4(14)-en-1-one                                                        | C <sub>15</sub> H <sub>24</sub> O              | 32.14 | 80.07 | 0.471 |
| Alcohols (11.346%) |            |                                                                               |                                                |       |       |       |
| 1                  | 78-70-6    | Linalool                                                                      | C <sub>10</sub> H <sub>18</sub> O              | 7.71  | 85.03 | 0.460 |
| 2                  | 1908-44-7  | Labda-8(17),14-diene-13,19-diol                                               | C <sub>20</sub> H <sub>34</sub> O <sub>2</sub> | 45.30 | 89.03 | 0.651 |
| 3                  | 29803-82-5 | cis-4-(Isopropyl)-1-methylcyclohex-2-en-1-ol                                  | C <sub>10</sub> H <sub>18</sub> O              | 8.16  | 87.28 | 0.213 |
| 4                  | -          | 1,7,7-Trimethylbicyclo[2.2.1]hept-5-en-2-ol                                   | C <sub>10</sub> H <sub>16</sub> O              | 8.25  | 87.87 | 0.093 |
| 5                  | 25269-17-4 | Thunbergol                                                                    | C <sub>20</sub> H <sub>34</sub> O              | 42.63 | 87.59 | 3.938 |

|                  |              |                                                                                  |                                                |       |       |       |
|------------------|--------------|----------------------------------------------------------------------------------|------------------------------------------------|-------|-------|-------|
| 6                | 19894-97-4   | (-)-myrteno                                                                      | C <sub>10</sub> H <sub>16</sub> O              | 9.53  | 86.01 | 0.393 |
| 7                | 536-50-5     | 1-(4-Methylphenyl)ethanol                                                        | C <sub>9</sub> H <sub>12</sub> O               | 9.65  | 86.30 | 0.150 |
| 8                | 3772-55-2    | Dehydroabietadienol                                                              | C <sub>20</sub> H <sub>32</sub> O              | 50.72 | 86.81 | 0.059 |
| 9                | 374925-73-2  | cis-3,14-Clerodadien-13-ol                                                       | C <sub>20</sub> H <sub>34</sub> O              | 37.59 | 87.21 | 0.265 |
| 10               | 514-99-8     | 6,6-dimethylbicyclo[3.1.1]heptane-2-methanol                                     | C <sub>10</sub> H <sub>18</sub> O              | 10.69 | 85.39 | 0.149 |
| 11               | 36653-82-4   | 1-Hexadecanol                                                                    | C <sub>16</sub> H <sub>34</sub> O              | 48.21 | 83.23 | 0.287 |
| 12               | 70000-19-0   | Verticillol                                                                      | C <sub>20</sub> H <sub>34</sub> O              | 36.40 | 86.75 | 3.597 |
| 13               | 586-82-3     | 4-(isopropyl)-1-methylcyclohex-3-en-1-ol                                         | C <sub>10</sub> H <sub>18</sub> O              | 8.38  | 83.07 | 0.042 |
| 14               | 1686-20-0    | p-Mentha-1,5-dien-8-ol                                                           | C <sub>10</sub> H <sub>16</sub> O              | 8.67  | 81.97 | 0.019 |
| 15               | -            | 2-((2R,4aR,8aS)-4a-Methyl-8-methylenedecahydronaphthalen-2-yl)prop-2-en-1-ol     | C <sub>15</sub> H <sub>24</sub> O              | 24.10 | 81.58 | 0.720 |
| 16               | 1632-73-1    | Fenchol                                                                          | C <sub>10</sub> H <sub>18</sub> O              | 8.03  | 81,23 | 0.071 |
| 17               | 7220-78-2    | (2E,6E,11Z)-3,7,13-Trimethyl-10-propan-2-ylcyclohexadeca-2,6,11-triene-1,13-diol | C <sub>20</sub> H <sub>34</sub> O <sub>2</sub> | 49.45 | 85.19 | 0.239 |
| Esters (8.052%)  |              |                                                                                  |                                                |       |       |       |
| 1                | 78277-23-3   | Cinnamoin                                                                        | C <sub>16</sub> H <sub>14</sub> O <sub>2</sub> | 39.76 | 86.40 | 0.043 |
| 2                | 1686-54-0    | Isopimara-8(14),15-dien-19-saeure-methylester                                    | C <sub>21</sub> H <sub>32</sub> O <sub>2</sub> | 46.40 | 92.70 | 1.517 |
| 3                | 1235-74-1    | Methyl dehydroabietate                                                           | C <sub>21</sub> H <sub>30</sub> O <sub>2</sub> | 50.00 | 90.84 | 1.842 |
| 4                | -            | (6,6-Dimethylbicyclo[3.1.1]hept-2-en-2-yl)methyl ethyl carbonate                 | C <sub>13</sub> H <sub>20</sub> O <sub>3</sub> | 11.80 | 87.70 | 0.108 |
| 5                | -            | Phthalic acid, di(oct-3-yl) ester                                                | C <sub>24</sub> H <sub>38</sub> O <sub>4</sub> | 58.31 | 85.52 | 0.011 |
| 6                | 80-26-2      | α-Terpinyl acetate                                                               | C <sub>12</sub> H <sub>20</sub> O <sub>2</sub> | 12.27 | 85.23 | 1.901 |
| 7                | 84-74-2      | dibutyl phthalate                                                                | C <sub>16</sub> H <sub>22</sub> O <sub>4</sub> | 34.39 | 89.48 | 0.126 |
| 8                | 1000373-80-3 | Ethyl 2-(5-methyl-5-vinyltetrahydrofuran-2-yl)propan-2-yl carbonate              | C <sub>13</sub> H <sub>22</sub> O <sub>4</sub> | 7.26  | 83.61 | 0.101 |
| 9                | -            | (2E,6E,10E)-3,7,11,15-Tetramethylhexadeca-2,6,10,14-tetraen-1-yl formate         | C <sub>21</sub> H <sub>34</sub> O <sub>2</sub> | 37.44 | 83.32 | 0.272 |
| 10               | 1079-01-2    | Myrtenyl acetate                                                                 | C <sub>12</sub> H <sub>18</sub> O <sub>2</sub> | 11.34 | 82.92 | 0.361 |
| 11               | 7042-36-6    | t-Butyl cinnamate                                                                | C <sub>13</sub> H <sub>16</sub> O <sub>2</sub> | 31.08 | 81.98 | 0.466 |
| 12               | 78-35-3      | Linalyl isobutyrate                                                              | C <sub>14</sub> H <sub>24</sub> O <sub>2</sub> | 10.49 | 81.89 | 0.762 |
| 13               | -            | Butyl 6,9,12-hexadecatrienoate                                                   | C <sub>20</sub> H <sub>34</sub> O <sub>2</sub> | 40.45 | 81.59 | 0.542 |
| Phenols (1.364%) |              |                                                                                  |                                                |       |       |       |
| 1                | 93-15-2      | Methyleugenol                                                                    | C <sub>11</sub> H <sub>14</sub> O <sub>2</sub> | 13.58 | 94.44 | 0.513 |
| 2                | 119-47-1     | 2,2-Methylenebis(6-Tert-Butyl-4-Methylphenol)                                    | C <sub>23</sub> H <sub>32</sub> O <sub>2</sub> | 53.24 | 93.68 | 0.851 |
| Ketones (1.057%) |              |                                                                                  |                                                |       |       |       |
| 1                | 2426-02-0    | 3,4,5,6-Tetrahydrophthalic anhydride                                             | C <sub>8</sub> H <sub>8</sub> O <sub>3</sub>   | 5.94  | 85.48 | 0.004 |

|                 |             |                                                                                                                                                     |                                                                  |       |       |       |
|-----------------|-------------|-----------------------------------------------------------------------------------------------------------------------------------------------------|------------------------------------------------------------------|-------|-------|-------|
| 2               | 464-48-2    | (-)-Camphor                                                                                                                                         | C <sub>10</sub> H <sub>16</sub> O                                | 8.62  | 92.99 | 0.423 |
| 3               | 473-08-5    | α-Cyperone                                                                                                                                          | C <sub>15</sub> H <sub>22</sub> O                                | 25.37 | 83.43 | 0.542 |
| 4               | 1196-01-6   | Bicyclo[3.1.1]hept-3-en-2-one, 4,6,6-trimethyl-, (1S)-                                                                                              | C <sub>10</sub> H <sub>14</sub> O                                | 9.78  | 81.98 | 0.088 |
| Others (5.017%) |             |                                                                                                                                                     |                                                                  |       |       |       |
| 1               | 21195-59-5  | 1,5,8-p-Menthatriene                                                                                                                                | C <sub>10</sub> H <sub>14</sub>                                  | 8.43  | 89.59 | 0.058 |
| 2               | 31574-44-4  | 2-isopropyl-4-methyl anisole                                                                                                                        | C <sub>11</sub> H <sub>16</sub> O                                | 10.15 | 85.27 | 0.466 |
| 3               | 540-97-6    | Cyclohexasiloxane, dodecamethyl-                                                                                                                    | C <sub>12</sub> H <sub>36</sub> O <sub>6</sub> Si <sub>6</sub>   | 10.30 | 86.53 | 0.074 |
| 4               | 556-67-2    | Octamethylcyclotetrasiloxane                                                                                                                        | C <sub>8</sub> H <sub>24</sub> O <sub>4</sub> Si <sub>4</sub>    | 5.82  | 90.44 | 0.002 |
| 5               | 242794-76-9 | Bicyclo[5.2.0]nonane, 2-methylene-4,8,8-trimethyl-4-vinyl-                                                                                          | C <sub>15</sub> H <sub>24</sub>                                  | 13.77 | 84.75 | 0.751 |
| 6               | 66575-55-1  | Hexacosane, 1-iodo-                                                                                                                                 | C <sub>26</sub> H <sub>53</sub> I                                | 68.71 | 84.62 | 0.042 |
| 7               | 934-74-7    | Benzene, 1-ethyl-3,5-dimethyl-                                                                                                                      | C <sub>10</sub> H <sub>14</sub>                                  | 6.41  | 84.20 | 0.310 |
| 8               | 1686-62-0   | Isopimaric acid methyl ester                                                                                                                        | C <sub>21</sub> H <sub>32</sub> O <sub>2</sub>                   | 48.10 | 83.91 | 0.445 |
| 9               | -           | 1-Phenanthrenecarboxylic acid, 1,2,3,4,4a,5,6,7,8,9,10,10a-dodecahydro-1,4a-dimethyl-7-(1-methylethylidene)-, methyl ester, [1R-(1.α,4a.β,10a.α.)]- | C <sub>21</sub> H <sub>32</sub> O <sub>2</sub>                   | 53.79 | 83.84 | 0.520 |
| 10              | 483-78-3    | Naphthalene, 1,6-dimethyl-4-(1-methylethyl)-                                                                                                        | C <sub>15</sub> H <sub>18</sub>                                  | 22.52 | 83.40 | 0.388 |
| 11              | 18772-36-6  | Cyclodecasiloxane, eicosamethyl-                                                                                                                    | C <sub>20</sub> H <sub>60</sub> O <sub>10</sub> Si <sub>10</sub> | 54.36 | 83.17 | 0.032 |
| 12              | 63180-33-6  | Muurol-5-en-4-one <cis-14-nor->                                                                                                                     | C <sub>14</sub> H <sub>22</sub> O                                | 24.53 | 83.15 | 1.126 |
| 13              | 106-49-0    | p-Aminotoluene                                                                                                                                      | C <sub>7</sub> H <sub>9</sub> N                                  | 19.13 | 83.15 | 0.505 |
| 14              | -           | 5-(4-Hexyloxybenzoyloxy)-2-(4-nitrophenyl)pyrimidine                                                                                                | C <sub>23</sub> H <sub>23</sub> N <sub>3</sub> O <sub>5</sub>    | 47.79 | 82.57 | 0.101 |
| 15              | 618-47-3    | m-Toluamide                                                                                                                                         | C <sub>8</sub> H <sub>9</sub> NO                                 | 12.16 | 81.39 | 0.123 |
| 16              | 1918-11-2   | terbucarb                                                                                                                                           | C <sub>17</sub> H <sub>25</sub> NO <sub>2</sub>                  | 15.80 | 80.65 | 0.054 |
| 17              | 78134-83-5  | Isoparvifuran                                                                                                                                       | C <sub>16</sub> H <sub>14</sub> O <sub>3</sub>                   | 36.62 | 80.52 | 0.007 |
| 18              | 17978-55-1  | Phenyl-1,2-diamine, N,4,5-trimethyl-                                                                                                                | C <sub>9</sub> H <sub>14</sub> N <sub>2</sub>                    | 9.45  | 80.26 | 0.013 |

"-" Indicates that the component is not queried in the database.
